# Supplementary material for: Association between the 2008–09 Seasonal Influenza Vaccine and Pandemic H1N1 Illness during Spring–Summer 2009: Four Observational Studies from Canada
Source: PLOS journal article supplement (doi:10.1371/journal.pmed.1000258), 2010-04-06
Supplement: S5 (10.1371/journal.pmed.1000258.s005) [file journal.pmed.1000258.s005]

## **Appendix E**

### **Ontario test-negative case-control study – Additional details**

**Appendix E1. Ontario pH1N1 test-negative case-control study: exclusion criteria and participation by study group**

|                                       | Community<br>pH1N1 cases | Hospitalized<br>pH1N1 cases | pH1N1 test-negative<br>community controls |
|---------------------------------------|--------------------------|-----------------------------|-------------------------------------------|
| Eligible                              |                          |                             |                                           |
| Participating before exclusions       | 294                      | 168                         | 484                                       |
| Exclusions                            |                          |                             |                                           |
| Hospitalized among test-negatives     |                          |                             | 40                                        |
| Missing vaccine status                | 15                       | 5                           | 10                                        |
| Recent travel to Mexico               | 7                        | 1                           | 59                                        |
| Without flu-like symptoms when tested | 17                       | 23                          | 76                                        |
| < 6 months of age                     | 5                        | 3                           | 11                                        |
| Final participation                   | 250                      | 136                         | 288                                       |

pH1N1= pandemic influenza A (H1N1)

## Appendix E2: Ontario pH1N1 test-negative case-control study: participant profile

|                                                 | Community pH1N1 cases (N= 250) |               |                |                |                |               | Hospitalized pH1N1 cases (N= 136) |               |                |                |                |               | pH1N1 test-negative community controls (N= 288) |               |                |                |                |               |
|-------------------------------------------------|--------------------------------|---------------|----------------|----------------|----------------|---------------|-----------------------------------|---------------|----------------|----------------|----------------|---------------|-------------------------------------------------|---------------|----------------|----------------|----------------|---------------|
|                                                 | 6-59<br>mos                    | 5-19<br>years | 20-34<br>years | 35-49<br>years | 50-59<br>years | ≥ 60<br>years | 6-59<br>mos                       | 5-19<br>years | 20-34<br>years | 35-49<br>years | 50-59<br>years | ≥ 60<br>years | 6-59<br>mos                                     | 5-19<br>years | 20-34<br>years | 35-49<br>years | 50-59<br>years | ≥ 60<br>years |
| <b>N</b>                                        | 17<br>N(%)                     | 134<br>N(%)   | 30<br>N(%)     | 36<br>N(%)     | 24<br>N(%)     | 9<br>N(%)     | 20<br>N(%)                        | 57<br>N(%)    | 26<br>N(%)     | 17<br>N(%)     | 8<br>N(%)      | 8<br>N(%)     | 27<br>N(%)                                      | 69<br>N(%)    | 57<br>N(%)     | 66<br>N(%)     | 39<br>N(%)     | 30<br>N(%)    |
| <b>Symptoms (among “flu-like” participants)</b> |                                |               |                |                |                |               |                                   |               |                |                |                |               |                                                 |               |                |                |                |               |
| Fever + cough                                   | 11 (65)                        | 98 (73)       | 17 (57)        | 23 (64)        | 16 (67)        | 2 (22)        | 14 (70)                           | 44 (77)       | 15 (58)        | 12 (71)        | 6 (75)         | 6 (75)        | 11 (41)                                         | 32 (46)       | 21 (37)        | 26 (39)        | 11 (28)        | 7 (23)        |
| ILI *                                           | 11 (65)                        | 97 (72)       | 17 (57)        | 23 (64)        | 16 (67)        | 2 (22)        | 13 (65)                           | 43 (75)       | 14 (54)        | 11 (65)        | 6 (75)         | 6 (75)        | 10 (37)                                         | 31 (45)       | 21 (37)        | 26 (39)        | 11 (28)        | 7 (23)        |
| <b>Female</b>                                   | 12 (71)                        | 87 (65)       | 17 (57)        | 19 (53)        | 16 (67)        | 4 (44)        | 14 (70)                           | 42 (74)       | 16 (62)        | 13 (76)        | 4 (50)         | 5 (63)        | 20 (74)                                         | 50 (72)       | 37 (65)        | 38 (58)        | 26 (67)        | 17 (57)       |
| <b>Chronic conditions</b>                       | 1 (6)                          | 16 (12)       | 1 (3)          | 1 (3)          | 11 (46)        | 5 (56)        | 3 (15)                            | 24 (42)       | 6 (23)         | 7 (41)         | 7 (88)         | 4 (50)        | 2 (7)                                           | 11 (16)       | 6 (11)         | 8 (12)         | 8 (21)         | 11 (37)       |
| <b>Smoker<sup>†</sup></b>                       | N/A                            | 5 (4)         | 8 (27)         | 4 (11)         | 5 (21)         | 0 (0)         | N/A                               | 1 (2)         | 9 (35)         | 4 (24)         | 4 (50)         | 2 (25)        | N/A                                             | 6 (9)         | 25 (44)        | 17 (26)        | 10 (26)        | 4 (13)        |
| <b>HCW<sup>‡</sup></b>                          | N/A                            | N/A           | 5 (17)         | 5 (14)         | 5 (21)         | 2 (22)        | N/A                               | N/A           | 6 (23)         | 1 (6)          | 1 (13)         | 0 (0)         | N/A                                             | N/A           | 8 (14)         | 9 (14)         | 2 (5)          | 3 (10)        |
| <b>Median MD visits 12mos</b>                   | 6.5                            | 3             | 2              | 4              | 3              | 4             | 5.5                               | 3             | 3              | 5              | 4              | 4             | 4                                               | 3             | 3              | 3              | 3              | 5             |
| <b>TIV Status</b>                               |                                |               |                |                |                |               |                                   |               |                |                |                |               |                                                 |               |                |                |                |               |
| 2008-09                                         | 7 (41)                         | 56 (42)       | 9 (30)         | 17 (47)        | 13 (54)        | 7 (78)        | 4 (20)                            | 20 (35)       | 7 (27)         | 4 (24)         | 5 (63)         | 6 (75)        | 6 (22)                                          | 15 (22)       | 16 (28)        | 22 (33)        | 17 (44)        | 20 (67)       |
| 2007-08                                         | 5 (29)                         | 66 (49)       | 12 (40)        | 19 (53)        | 15 (63)        | 7 (78)        | 4 (20)                            | 32 (56)       | 9 (35)         | 6 (35)         | 6 (75)         | 7 (88)        | 7 (26)                                          | 25 (36)       | 16 (28)        | 24 (36)        | 20 (51)        | 21 (70)       |
| 2007-08 only                                    | 0 (0)                          | 17 (13)       | 6 (20)         | 3 (8)          | 2 (8)          | 0 (0)         | 2 (10)                            | 12 (21)       | 2 (8)          | 3 (18)         | 2 (25)         | 1 (13)        | 2 (7)                                           | 13 (19)       | 7 (12)         | 7 (11)         | 4 (10)         | 2 (7)         |
| 2008-09 only                                    | 2 (12)                         | 7 (5)         | 3 (10)         | 1 (3)          | 0 (0)          | 0 (0)         | 2 (10)                            | 0 (0)         | 0 (0)          | 0 (0)          | 1 (6)          | 1 (13)        | 1 (4)                                           | 3 (4)         | 7 (12)         | 5 (8)          | 1 (3)          | 1 (3)         |
| 2007 & 2008                                     | 5 (29)                         | 49 (37)       | 6 (20)         | 16 (44)        | 13 (54)        | 7 (78)        | 2 (10)                            | 20 (35)       | 7 (27)         | 3 (18)         | 4 (50)         | 6 (75)        | 5 (19)                                          | 12 (17)       | 9 (16)         | 17 (26)        | 16 (41)        | 19 (63)       |
| 5 in 5 years                                    | N/A                            | 38 (28)       | 5 (17)         | 11 (31)        | 9 (38)         | 6 (67)        | N/A                               | 16 (28)       | 6 (23)         | 3 (18)         | 4 (50)         | 5 (63)        | N/A                                             | 9 (13)        | 5 (9)          | 13 (20)        | 13 (33)        | 16 (53)       |
| ≥1 in 5 yrs                                     | 7 (41)                         | 90 (67)       | 17 (57)        | 25 (69)        | 17 (71)        | 8 (89)        | 7 (35)                            | 45 (79)       | 14 (54)        | 8 (47)         | 7 (88)         | 7 (88)        | 8 (30)                                          | 36 (52)       | 30 (53)        | 38 (58)        | 24 (62)        | 25 (83)       |
| None in 5 yrs                                   | 10 (59)                        | 44 (33)       | 13 (43)        | 11 (31)        | 7 (29)         | 1 (11)        | 13 (65)                           | 12 (21)       | 12 (46)        | 9 (53)         | 1 (13)         | 1 (13)        | 19 (70)                                         | 33 (48)       | 27 (47)        | 28 (42)        | 15 (38)        | 5 (17)        |
| 1-3 in 5 yrs                                    | 4 (24)                         | 38 (28)       | 12 (40)        | 10 (28)        | 8 (33)         | 0 (0)         | 7 (35)                            | 20 (35)       | 8 (31)         | 4 (24)         | 2 (25)         | 1 (13)        | 6 (22)                                          | 22 (32)       | 20 (35)        | 21 (32)        | 10 (26)        | 9 (30)        |
| 4-5 in 5 yrs                                    | 3 (18)                         | 52 (39)       | 5 (17)         | 15 (42)        | 9 (38)         | 8 (89)        | 12 (21)                           | 25 (44)       | 6 (23)         | 4 (24)         | 5 (63)         | 6 (75)        | 2 (7)                                           | 14 (20)       | 10 (18)        | 17 (26)        | 14 (36)        | 16 (53)       |
| <b>No chronic condition (N)</b>                 | 16                             | 115           | 29             | 31             | 12             | 4             | 17                                | 32            | 19             | 10             | 1              | 4             | 24                                              | 57            | 49             | 55             | 29             | 16            |
| TIV 2008-09                                     | 7 (44)                         | 47 (41)       | 9 (31)         | 17 (55)        | 7 (58)         | 3 (75)        | 3 (18)                            | 12 (38)       | 5 (26)         | 1 (10)         | 0 (0)          | 2 (50)        | 5 (21)                                          | 9 (16)        | 13 (27)        | 20 (36)        | 12 (41)        | 9 (56)        |
| <b>With chronic conditions (N)</b>              | 1                              | 16            | 1              | 1              | 11             | 5             | 3                                 | 24            | 6              | 7              | 7              | 4             | 2                                               | 11            | 6              | 8              | 8              | 11            |
| TIV 2008-09                                     | 0 (0)                          | 6 (38)        | 0 (0)          | 0 (0)          | 6 (55)         | 4 (80)        | 1 (33)                            | 8 (33)        | 2 (33)         | 3 (43)         | 5 (71)         | 4 (100)       | 1 (50)                                          | 6 (55)        | 1 (17)         | 2 (25)         | 4 (50)         | 8 (73)        |

pH1N1= pandemic influenza A (H1N1); TIV=trivalent inactivated influenza vaccine; \*ILI=influenza-like illness: fever plus cough plus one or more of sore throat, myalgia, arthralgia, headache or prostration; N/A=Not applicable; †Smoker defined as: Ever smoked a cigarette in the past 6 months; ‡HCW=Health care worker defined as: doctor, nurse or other health care professional.

NOTE: where percentages do not sum 100%, this is owing to missing data
